# Supplementary material for: Progress toward a universal biomedical data translator
Source: PubMed Central journal article supplement — Clin Transl Sci. 2022 Jun 6;15(8):1838–47. doi: 10.1111/cts.13301 (PMC9372428; doi:10.1111/cts.13301), 2022-06-06

## Supplementary Materials

### *Clinical and Translational Science*

## Progress Toward a Universal Biomedical Data Translator

Karamarie Fecho<sup>1\*†</sup>, Anne T. Thessen<sup>2\*</sup>, Sergio E. Baranzini<sup>3</sup>, Chris Bizon<sup>1</sup>, Jennifer J. Hadlock<sup>4</sup>, Sui Huang<sup>4</sup>, Ryan T. Roper<sup>4</sup>, Noel Southall<sup>5</sup>, Casey Ta<sup>6</sup>, Paul B. Watkins<sup>7</sup>, Mark D. Williams<sup>5</sup>, Hao Xu<sup>1</sup>, William Byrd<sup>8</sup>, Vlado Dančik<sup>9</sup>, Marc P. Duby<sup>10</sup>, Michel Dumontier<sup>11</sup>, Gustavo Glusman<sup>4</sup>, Nomi L. Harris<sup>12</sup>, Eugene W. Hinderer<sup>13</sup>, Greg Hyde<sup>14</sup>, Adam Johs<sup>15</sup>, Andrew Su<sup>16</sup>, Guangrong Qin<sup>4</sup>, Qian Zhu<sup>5</sup>, and the Biomedical Data Translator Consortium

1. Renaissance Computing Institute, University of North Carolina at Chapel Hill, Chapel Hill, NC, USA
2. Center for Health AI, University of Colorado Anschutz Medical Campus, Aurora, CO, USA
3. Weill Institute for Neurosciences, Department of Neurology, University of California at San Francisco, San Francisco, CA, USA
4. Institute for Systems Biology, Seattle, WA, USA
5. Division of Preclinical Innovation, National Center for Advancing Translational Sciences, National Institutes of Health, Rockville, MD, USA
6. Department of Biomedical Informatics, Columbia University, New York, NY, USA
7. Division of Pharmacotherapy and Experimental Therapeutics, Eshelman School of Pharmacy, University of North Carolina at Chapel Hill, Chapel Hill, USA
8. Hugh Kaul Precision Medicine Institute, University of Alabama at Birmingham, Birmingham, AL, USA
9. Chemical Biology and Therapeutics Science Program, Broad Institute, Cambridge, MA, USA
10. Medical and Population Genetics Program, Broad Institute, Cambridge, MA, USA
11. Institute of Data Science, Maastricht University, Maastricht, Netherlands
12. Division of Environmental Genomics and Systems Biology, Lawrence Berkeley National Laboratory, Berkeley, CA, USA
13. Tufts Clinical and Translational Science Institute, Tufts Medical Center, Boston, MA, USA
14. Thayer School of Engineering, Dartmouth College, Hanover, NH, USA
15. Department of Information Science, College of Computing and Informatics, Drexel University, Philadelphia, PA, USA
16. Department of Integrative Structural and Computational Biology, The Scripps Research Institute, La Jolla, CA, USA

+ Consortial/collaborative authors

*\*These authors served as co-first authors*

*†Correspondence: Karamarie Fecho; 100 Europa Drive, Suite 540, Chapel Hill, NC 27517; Phone: 919-445-9640; Email: [kfecho@copperlineprofessionalsolutions.com](mailto:kfecho@copperlineprofessionalsolutions.com), [kfecho@renci.org](mailto:kfecho@renci.org)*

## Supplementary Figures

**Figure S1.** Timeline and key milestones for the Translator program, September 2016 through September 2022. Abbreviations: FOA = funding opportunity announcement; RFP = request for proposals; SME = subject matter expert; TBD = to be determined; UI = user interface. (Graphic prepared by Tyler F. Beck and adapted by Karamarie Fecho.)

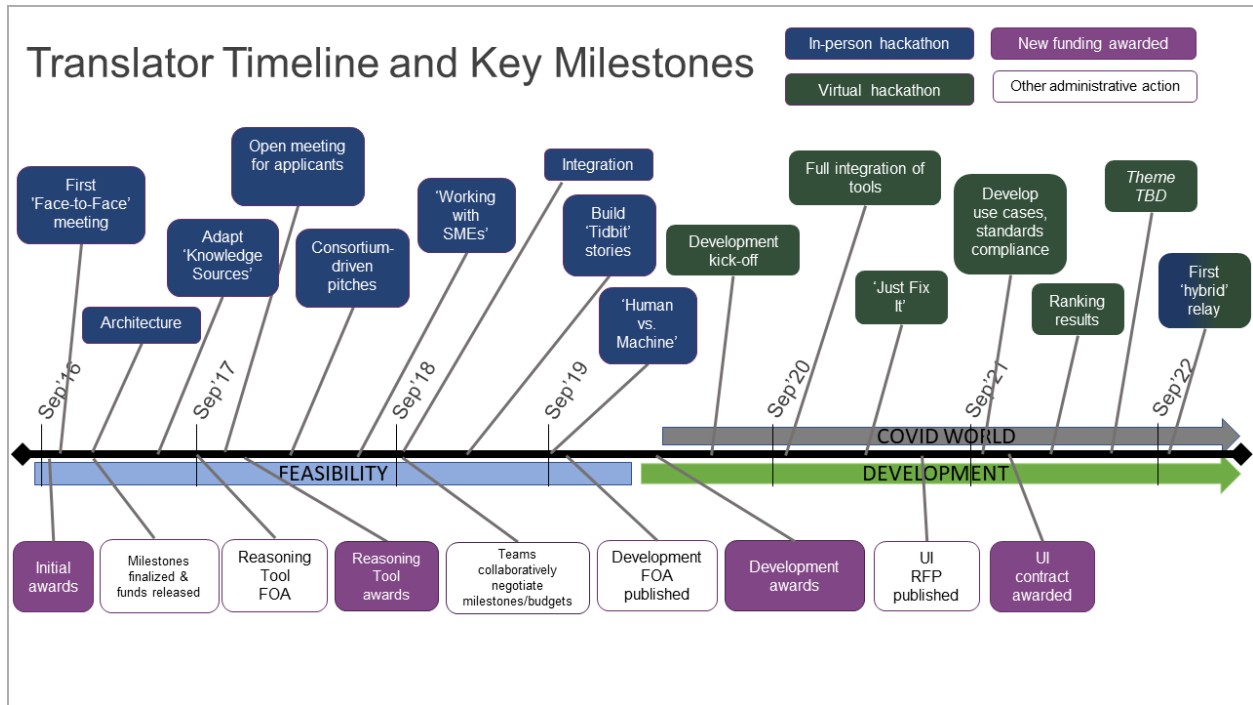

Supplement: CTS-15-1838-s001.pdf [file CTS-15-1838-s001.pdf]
